# Supplementary material for: Quantifying nutrient fluxes with a new hyporheic passive flux meter (HPFM)
Source: Copernicus journal article supplement (doi:10.5194/bg-14-631-2017), 2017-02-09
Supplement: Supplementary file 1 [file bg-14-631-2017-supplement.zip]

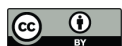

## *Supplement of*

# **Quantifying nutrient fluxes with a new hyporheic passive flux meter (HPFM)**

**Julia Vanessa Kunz et al.**

*Correspondence to:* Julia Vanessa Kunz ([vanessa.kunz@ufz.de](mailto:vanessa.kunz@ufz.de))

- [bg-14-631-2017-supplement-title-page.pdf](#)
- [Supplement S1.xlsx](#)

The copyright of individual parts of the supplement might differ from the CC-BY 3.0 licence.
